# Supplementary material
Source: publisher site journal article supplement (https://cdn.jamanetwork.com/ama/content_public/journal/jamanetworkopen/939059/zoi221424supp2_prod_1672151835.33677.pdf)
Supplement: Supplementary file [file zoi221424supp2_prod_1672151835.33677.pdf]

## Data Sharing Statement

Geris. Evaluation of the Association Between Congenital Cytomegalovirus Infection and Pediatric Acute Lymphoblastic Leukemia. *JAMA Netw Open*. Published January 09, 2023. doi:10.1001/jamanetworkopen.2022.50219

### Data

**Data available:** Yes

**Data types:** Other (please specify)

**Additional Information:** The data that support the findings of this study are available from Michigan BioTrust for Health (MBH) but restrictions apply to the availability of these data, which were used under data use agreements for the current study, and so are not publicly available. Data are however available from the authors upon reasonable request and with permission of MBH.

**How to access data:** <https://www.michigan.gov/mdhhs/adult-child-serv/childrenfamilies/hereditary/biotrust/michigan-biotrust-for-health-dried-blood-spot-research>  
[BioTrust@Michigan.gov](mailto:BioTrust@Michigan.gov)

**When available:** With publication

### Supporting Documents

**Document types:** None

### Additional Information

**Who can access the data:** Researchers whose proposed use of the data has been approved

**Types of analyses:** For specified purpose

**Mechanisms of data availability:** After approval of a proposal and with signed data access agreement by MBH
